# Supplementary material
Source: MDPI journal article supplement (https://www.mdpi.com/2071-1050/13/19/11103)
Supplement: s1 [file s1]

## SUPPLEMENTARY MATERIALS

**Table S1.** Official government sources of information.

| Expenditure budget category                     | Federal                                                                       | Campeche                                                                                                  | Quintana Roo                                                                                                    | Yucatan                                                                                                                         |
|-------------------------------------------------|-------------------------------------------------------------------------------|-----------------------------------------------------------------------------------------------------------|-----------------------------------------------------------------------------------------------------------------|---------------------------------------------------------------------------------------------------------------------------------|
| Fishery and Aquaculture (08)                    | <a href="http://www.dof.gob.mx/index.php">http://www.dof.gob.mx/index.php</a> | <a href="https://asecam.gob.mx/presupuesto-de-egresos/">https://asecam.gob.mx/presupuesto-de-egresos/</a> | <a href="https://qroo.gob.mx/ieea/presupuesto-de-egresos/">https://qroo.gob.mx/ieea/presupuesto-de-egresos/</a> | <a href="https://transparencia.yucatan.gob.mx/presupuestacion.php">https://transparencia.yucatan.gob.mx/presupuestacion.php</a> |
| Communication and transport (09)                | <a href="http://www.dof.gob.mx/index.php">http://www.dof.gob.mx/index.php</a> | <a href="https://asecam.gob.mx/presupuesto-de-egresos/">https://asecam.gob.mx/presupuesto-de-egresos/</a> | <a href="https://qroo.gob.mx/ieea/presupuesto-de-egresos/">https://qroo.gob.mx/ieea/presupuesto-de-egresos/</a> | <a href="https://transparencia.yucatan.gob.mx/presupuestacion.php">https://transparencia.yucatan.gob.mx/presupuestacion.php</a> |
| Environment and natural resources (16)          | <a href="http://www.dof.gob.mx/index.php">http://www.dof.gob.mx/index.php</a> | <a href="https://asecam.gob.mx/presupuesto-de-egresos/">https://asecam.gob.mx/presupuesto-de-egresos/</a> | <a href="https://qroo.gob.mx/ieea/presupuesto-de-egresos/">https://qroo.gob.mx/ieea/presupuesto-de-egresos/</a> | <a href="https://transparencia.yucatan.gob.mx/presupuestacion.php">https://transparencia.yucatan.gob.mx/presupuestacion.php</a> |
| Energy (18)                                     | -                                                                             | <a href="https://asecam.gob.mx/presupuesto-de-egresos/">https://asecam.gob.mx/presupuesto-de-egresos/</a> | -                                                                                                               | -                                                                                                                               |
| Tourism (21)                                    | -                                                                             | <a href="https://asecam.gob.mx/presupuesto-de-egresos/">https://asecam.gob.mx/presupuesto-de-egresos/</a> | <a href="https://qroo.gob.mx/ieea/presupuesto-de-egresos/">https://qroo.gob.mx/ieea/presupuesto-de-egresos/</a> | <a href="https://qroo.gob.mx/ieea/presupuesto-de-egresos/">https://qroo.gob.mx/ieea/presupuesto-de-egresos/</a>                 |
| Programmable spending in natural disasters (23) | <a href="http://www.dof.gob.mx/index.php">http://www.dof.gob.mx/index.php</a> | -                                                                                                         | -                                                                                                               | -                                                                                                                               |

**Table S2.** Paired Sampled Statistics.

|       |                                                                              | Media            | N | Desv. Deviation | Dev. Average error |
|-------|------------------------------------------------------------------------------|------------------|---|-----------------|--------------------|
| Par 1 | Aquaculture, fishing and hunting of Campeche (2007-2012)                     | 166,255,517.5000 | 6 | 131206198.23441 | 53564706.12746     |
|       | Aquaculture, fishing and hunting of Campeche (2013-2018)                     | 142,355,856.3333 | 6 | 137072259.06584 | 55959515.43365     |
| Par 2 | Aquaculture, hunting and fishing of Quintana Roo (2007-2012)                 | 171,943,786.6667 | 6 | 281366851.15958 | 114867535.97910    |
|       | Aquaculture, fishing and hunting of Quintana Roo (2013-2018)                 | 154,488,230.8333 | 6 | 124821604.33496 | 50958206.58270     |
| Par 3 | Aquaculture, fishing and hunting of Yucatan (2007-2012)                      | 211,361,026.0000 | 6 | 52351741.87449  | 21372509.12307     |
|       | Aquaculture, fishing and hunting of Yucatan (2013-2018)                      | 88,155,958.1667  | 6 | 123873308.59747 | 50571066.46902     |
| Par 4 | Highway and port infrastructure program category of Campeche (2007-2012)     | 685,536,937.9417 | 6 | 415784121.26058 | 169743156.70665    |
|       | Highway and port infrastructure program category of Campeche (2013-2018)     | 231,537,351.5000 | 6 | 230497717.48719 | 94100299.11997     |
| Par 5 | Highway and port infrastructure program category of Quintana Roo (2007-2012) | 726,007,123.5000 | 6 | 85350519.63950  | 34844203.73303     |
|       | Highway and port infrastructure program category of Quintana Roo (2013-2018) | 86,544,168.0000  | 6 | 59661125.62385  | 24356552.54309     |
| Par 6 | Highway and port infrastructure program category of Yucatan (2007-2012)      | 601,405,446.3333 | 6 | 201416633.94715 | 82227996.47991     |
|       | Highway and port infrastructure program category of Yucatan (2013-2018)      | 116,283,228.8333 | 6 | 95825666.84486  | 39120664.67197     |
| Par 7 | Natural Disaster Fund Category of Campeche (2007-2012)                       | 148,802,330.2803 | 6 | 153449956.27635 | 62645682.32157     |
|       | Natural Disaster Fund Category of Campeche (2013-2018)                       | 256,913,904.6667 | 6 | 396645899.32196 | 161930010.31769    |

|        |                                                            |                    |   |                   |                  |
|--------|------------------------------------------------------------|--------------------|---|-------------------|------------------|
| Par 8  | Natural Disaster Fund Category of Quintana Roo (2007-2012) | 185,088,819.8900   | 6 | 405474446.10429   | 165534249.44886  |
|        | Natural Disaster Fund Category of Quintana Roo (2013-2018) | 235,607,147.4123   | 6 | 197695436.17231   | 80708823.84985   |
| Par 9  | Natural Disaster Fund Category of Yucatan (2007-2012)      | 260,135,539.4217   | 6 | 537154650.82918   | 219292467.91573  |
|        | Natural Disaster Fund Category of Yucatan (2013-2018)      | 15,999,283.0117    | 6 | 3969530.18738     | 1620553.91294    |
| Par 10 | Tourism Category of Campeche (2007-2012)                   | 225,009,665.9833   | 6 | 37735563.82758    | 15405479.42230   |
|        | Tourism Category of Campeche (2013-2018)                   | 156,251,262.0667   | 6 | 50759326.30900    | 20722408.19075   |
| Par 11 | Tourism Category of Quintana Roo (2007-2012)               | 292,064,996.0500   | 6 | 28780955.69287    | 11749775.95953   |
|        | Tourism Category of Quintana Roo (2013-2018)               | 5,776,191,982.6667 | 6 | 13314644720.73067 | 5435680945.37200 |
| Par 12 | Tourism Category of Yucatan (2007-2012)                    | 82,165,311.5250    | 6 | 74014039.38579    | 30216105.04957   |
|        | Tourism Category of Yucatan (2013-2018)                    | 191,207,768.5333   | 6 | 79810841.23841    | 32582639.49606   |

Table S3. Results of the t-test for paired samples.

|                                                                                                                                                             | Matched differences |                    |                                           |                |        |    |                  |
|-------------------------------------------------------------------------------------------------------------------------------------------------------------|---------------------|--------------------|-------------------------------------------|----------------|--------|----|------------------|
|                                                                                                                                                             | Media               | Estandar deviation | 95% confidence interval of the difference |                | t      | gl | Sig. (bilateral) |
|                                                                                                                                                             |                     |                    | Inferior                                  | Superior       |        |    |                  |
| Highway and port infrastructure program category of Quintana Roo (2007-2012) - Highway and port infrastructure program category of Quintana Roo (2013-2018) | 639,462,955.50      | 135,903,938.34     | 496,840,519.00                            | 782,085,391.99 | 11.525 | 5  | 0.000            |
| Highway and port infrastructure program category of Yucatan (2007-2012) - Highway and port infrastructure program category of Yucatan (2013-2018)           | 485,122,217.50      | 182,685,917.55     | 293,405,104.71                            | 676,839,330.29 | 6.505  | 5  | 0.001            |
| Tourism Category of Campeche (2007-2012) - Tourism Category of Campeche (2013-2018)                                                                         | 68,758,403.92       | 57,267,811.15      | 8,659,521.88                              | 128,857,285.95 | 2.941  | 5  | 0.032            |



**Table S4.** Wilcoxon signed ranked test.

|                                                                                                                                                     |                  | N   | Average range | Sum of ranks |
|-----------------------------------------------------------------------------------------------------------------------------------------------------|------------------|-----|---------------|--------------|
| Aquaculture, hunting and fishing of Campeche (2007-2012) - Aquaculture, hunting and fishing of Campeche (2013-2018)                                 | Negativos rankes | 3a  | 3.00          | 9.00         |
|                                                                                                                                                     | Positives rankes | 3b  | 4.00          | 12.00        |
|                                                                                                                                                     | Ties             | 0c  |               |              |
|                                                                                                                                                     | Total            | 6   |               |              |
| Aquaculture, hunting and fishing of Quintana Roo (2007-2012) - Aquaculture, hunting and fishing of Quintana Roo (2013-2018)                         | Negativos rankes | 4d  | 3.00          | 12.00        |
|                                                                                                                                                     | Positives rankes | 2e  | 4.50          | 9.00         |
|                                                                                                                                                     | Ties             | 0f  |               |              |
|                                                                                                                                                     | Total            | 6   |               |              |
| Aquaculture, hunting and fishing of Yucatan (2007-2012) - Aquaculture, hunting and fishing of Yucatan (2013-2018)                                   | Negativos rankes | 5g  | 3.40          | 17.00        |
|                                                                                                                                                     | Positives rankes | 1h  | 4.00          | 4.00         |
|                                                                                                                                                     | Ties             | 0i  |               |              |
|                                                                                                                                                     | Total            | 6   |               |              |
| Highway and port infrastructure program category of Campeche (2007-2012) - Highway and port infrastructure program category of Campeche (2013-2018) | Negativos rankes | 5j  | 3.60          | 18.00        |
|                                                                                                                                                     | Positives rankes | 1k  | 3.00          | 3.00         |
|                                                                                                                                                     | Ties             | 0l  |               |              |
|                                                                                                                                                     | Total            | 6   |               |              |
| Natural Disaster Fund of Campeche (2007-2012) - Natural Disaster Fund of Campeche (2013-2018)                                                       | Negativos rankes | 3m  | 3.33          | 10.00        |
|                                                                                                                                                     | Positives rankes | 3n  | 3.67          | 11.00        |
|                                                                                                                                                     | Ties             | 0o  |               |              |
|                                                                                                                                                     | Total            | 6   |               |              |
| Natural Disaster Fund of Quintana Roo (2007-2012) - Natural Disaster Fund of Quintana Roo (2013-2018)                                               | Negativos rankes | 2p  | 3.50          | 7.00         |
|                                                                                                                                                     | Positives rankes | 4q  | 3.50          | 14.00        |
|                                                                                                                                                     | Ties             | 0r  |               |              |
|                                                                                                                                                     | Total            | 6   |               |              |
| Natural Disaster Fund of Yucatan (2007-2012) - Natural Disaster Fund of Yucatan (2013-2018)                                                         | Negativos rankes | 4s  | 4.50          | 18.00        |
|                                                                                                                                                     | Positives rankes | 2t  | 1.50          | 3.00         |
|                                                                                                                                                     | Ties             | 0u  |               |              |
|                                                                                                                                                     | Total            | 6   |               |              |
| Tourism Category of Quintana Roo (2007-2012) - Tourism Category of Quintana Roo (2013-2018)                                                         | Negativos rankes | 1v  | 1.00          | 1.00         |
|                                                                                                                                                     | Positives rankes | 5w  | 4.00          | 20.00        |
|                                                                                                                                                     | Ties             | 0x  |               |              |
|                                                                                                                                                     | Total            | 6   |               |              |
| Tourism Category of Yucatan (2007-2012) - Tourism Category of Yucatan (2013-2018)                                                                   | Negativos rankes | 1y  | 1.00          | 1.00         |
|                                                                                                                                                     | Positives rankes | 5z  | 4.00          | 20.00        |
|                                                                                                                                                     | Ties             | 0aa |               |              |
|                                                                                                                                                     | Total            | 6   |               |              |

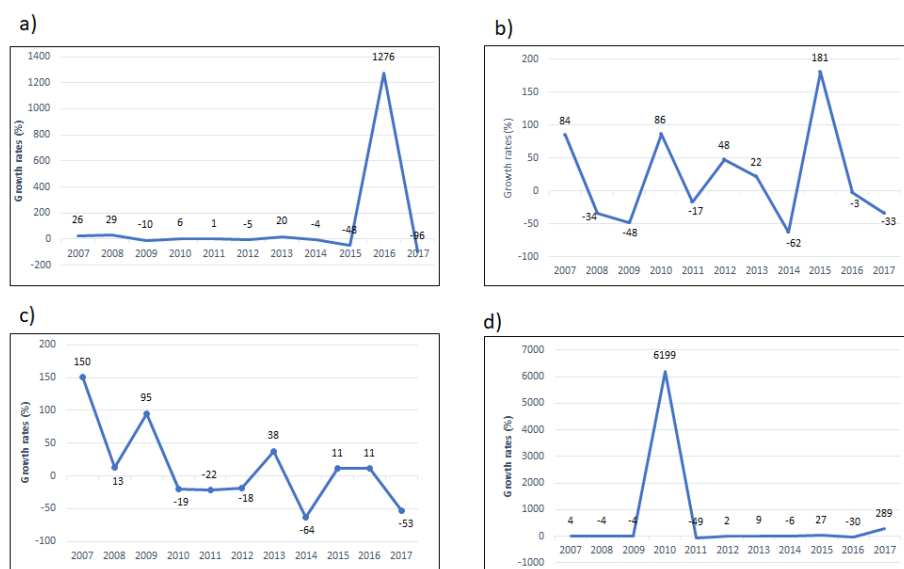

**Figure S1.** Changes in coastal programs (2007–2018): a) Sector 16 Environment and natural resources b) Sector 08 Fishery and aquaculture sector, c) Sector 09 Communication and transport and d) Sector 23 FONDEN. It should be noted that 2007 refers to the period 2007–2008 and so on.

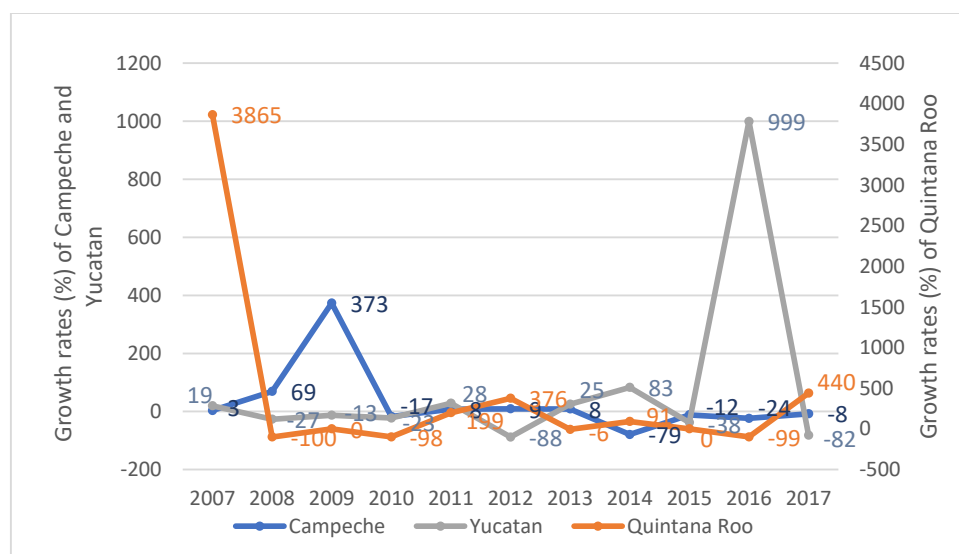

**Figure S2.** Growth rates of sector 08: Aquaculture, fishing and hunting. Source: Elaborated using data derived from the expenditure Budget published in the Official Gazette of the Federation (2007–2018). Note that the year 2007 refers to the period from 2007–2008.

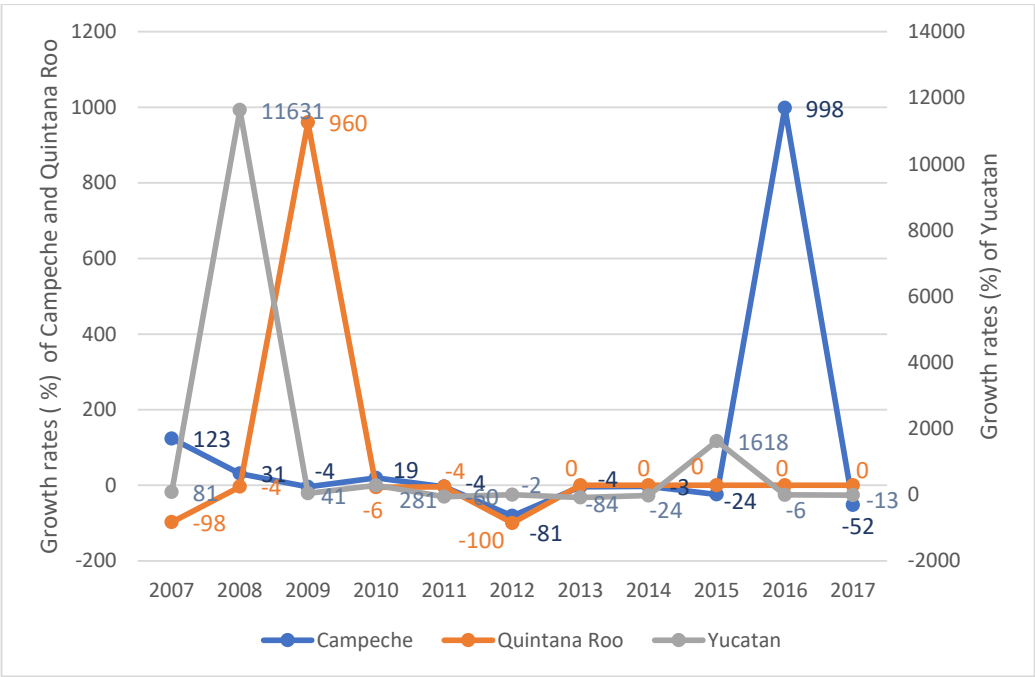

Figure S3. Changes in growth rates in natural disasters in the agriculture and fishing sector (2007-2018).

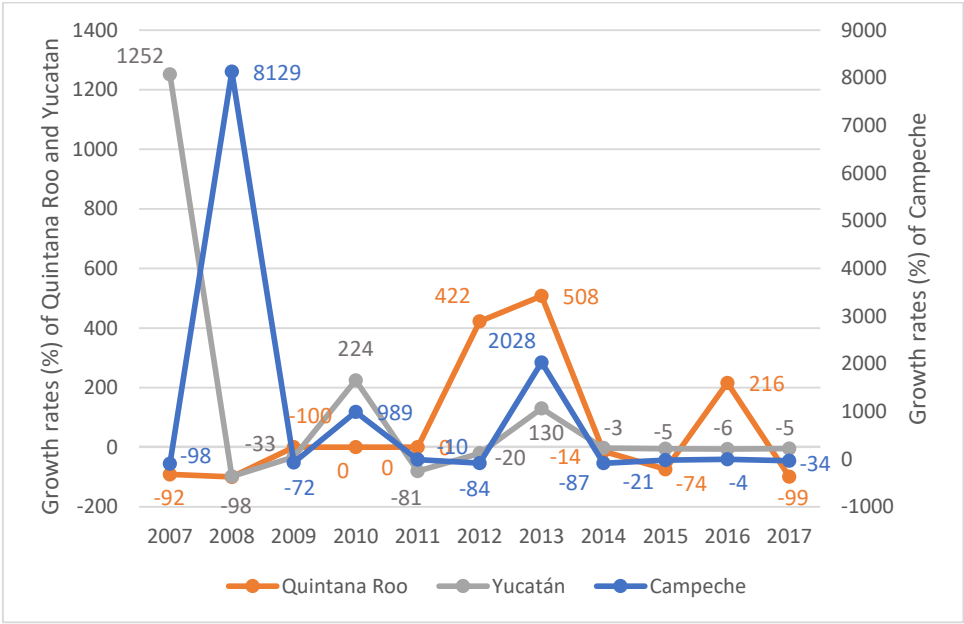

Figure S4. Changes in growth rates in the Natural Disaster Fund (2007-2018).

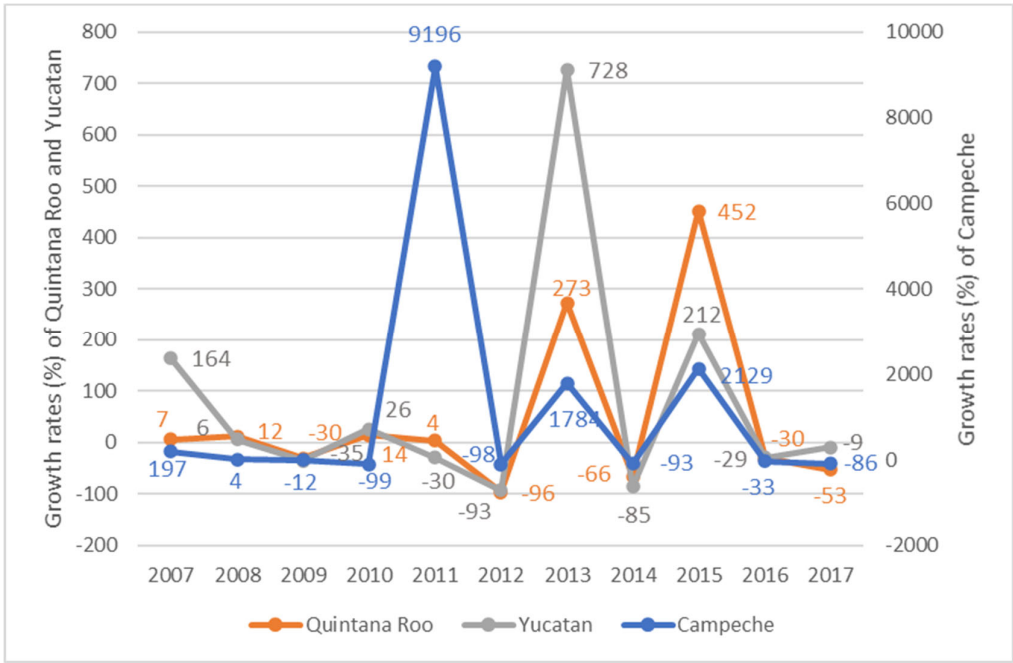

Figure S5. Change in growth rates in the highway and port infrastructure program (2007-2018).

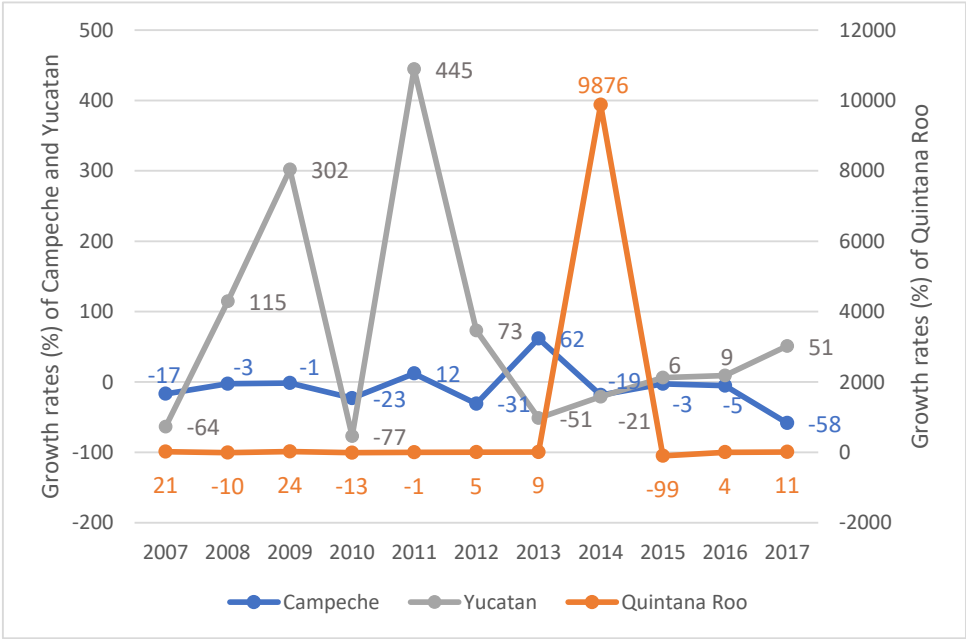

Figure S6. Change in growth rates in the Tourism Category (2007-2018).



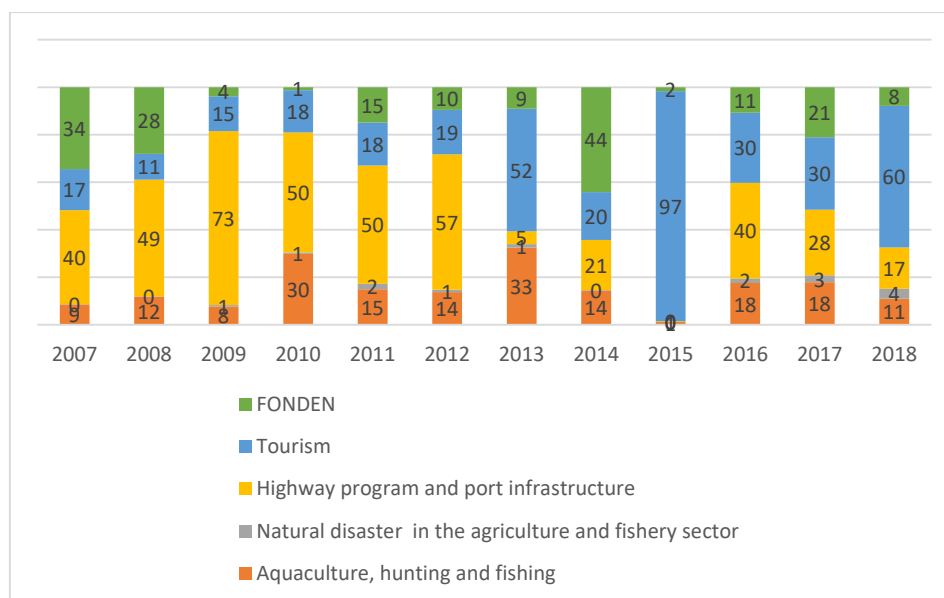

**Figure S7.** Changes in growth rates in the category of aquaculture, hunting and fishing, and natural disaster in the agriculture and fishery sector, highway program and port infrastructure, tourism and FONDEN of the 3 states of the sum total of the 5 categories of the 3 states.
